# Supplementary figures and images for: Nonlinear transient amplification in recurrent neural networks with short-term plasticity
Source: eLife journal article supplement (doi:10.7554/elife.71263), 2021-12-13

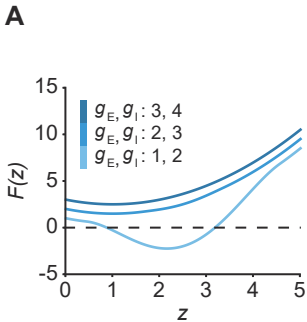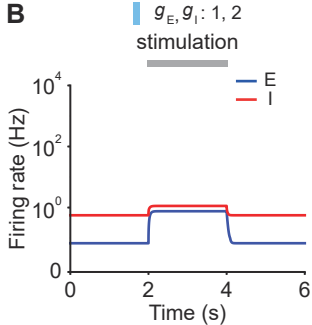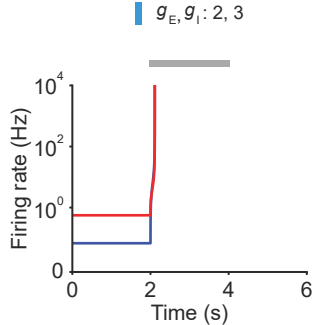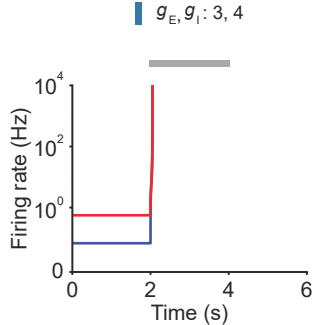

Supplement: supp [file elife_poa_e71263_Figure_1_figure_supplement_1.pdf › elife_poa_e71263_Figure_1_figure_supplement_1.pdf]

**A**

strong spike-frequency adaptation

stimulation

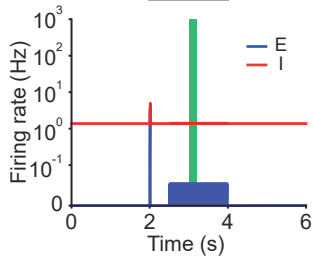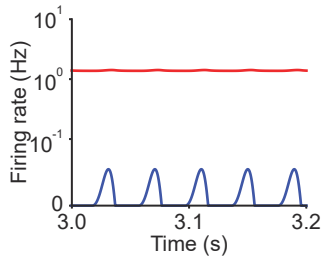**B**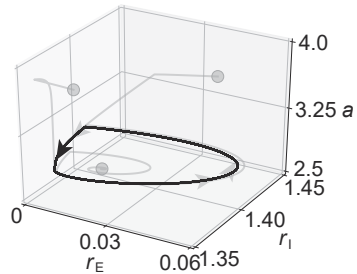

Supplement: supp [file elife_poa_e71263_Figure_2_figure_supplement_1.pdf › elife_poa_e71263_Figure_2_figure_supplement_1.pdf]

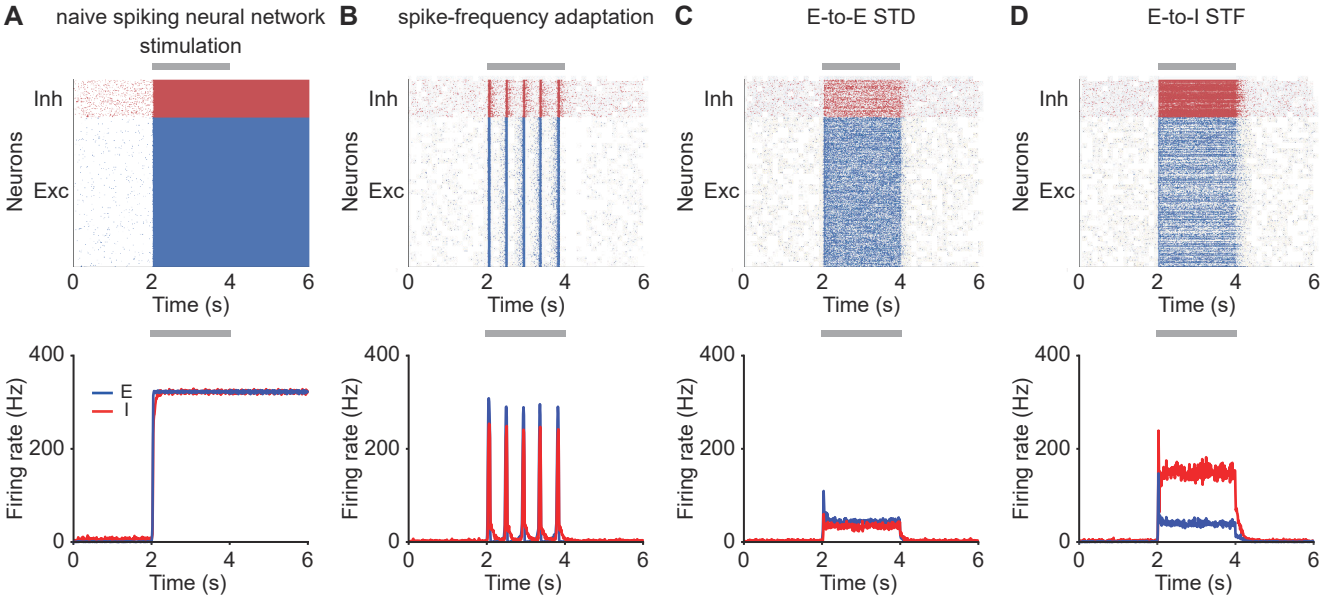

Supplement: supp [file elife_poa_e71263_Figure_2_figure_supplement_10.pdf › elife_poa_e71263_Figure_2_figure_supplement_10.pdf]

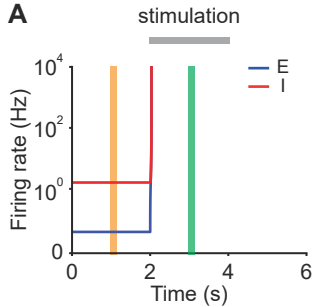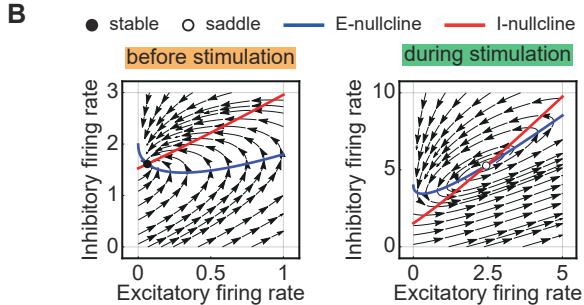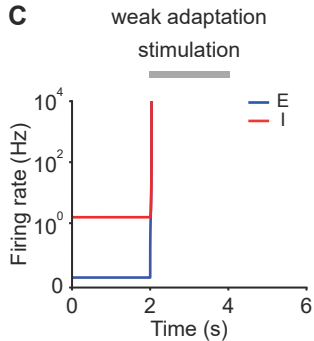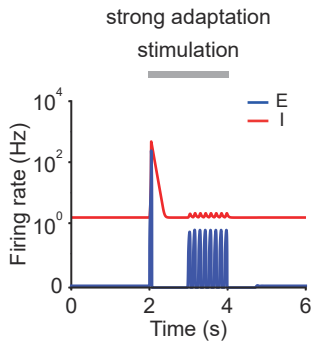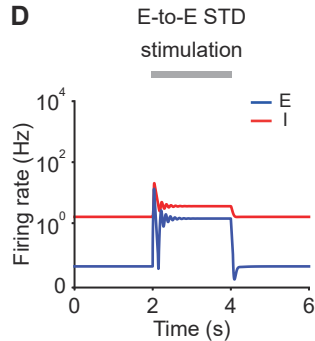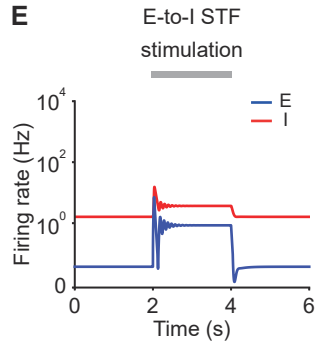

Supplement: supp [file elife_poa_e71263_Figure_2_figure_supplement_11.pdf › elife_poa_e71263_Figure_2_figure_supplement_11.pdf]

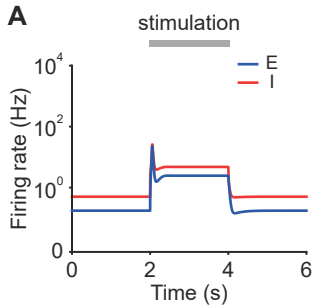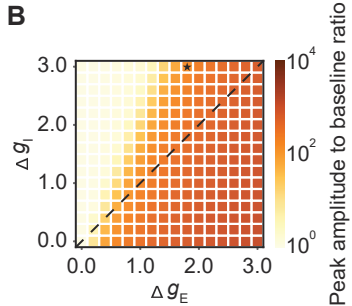

Supplement: supp [file elife_poa_e71263_Figure_2_figure_supplement_12.pdf › elife_poa_e71263_Figure_2_figure_supplement_12.pdf]

**A**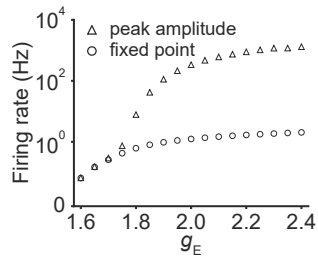**B**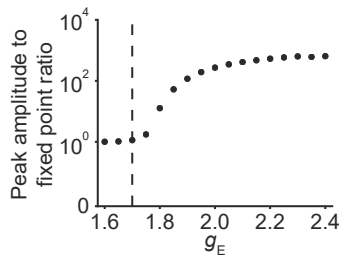**C**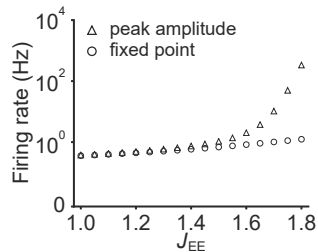**D**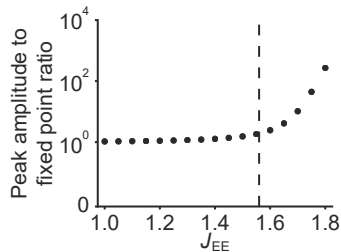

Supplement: supp [file elife_poa_e71263_Figure_2_figure_supplement_2.pdf › elife_poa_e71263_Figure_2_figure_supplement_2.pdf]

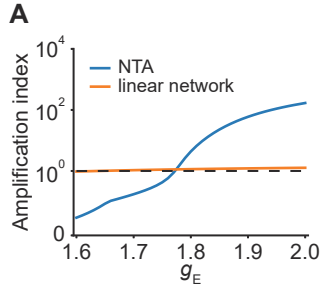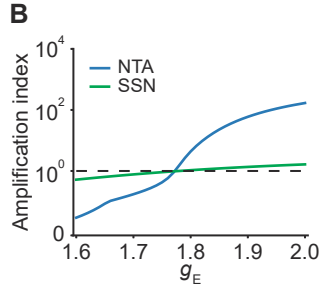

**C** linear network with E-to-E STD

stimulation

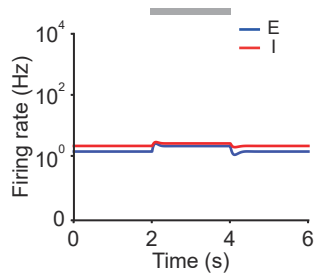

**D** SSN

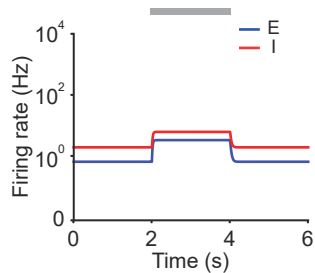

Supplement: supp [file elife_poa_e71263_Figure_2_figure_supplement_3.pdf › elife_poa_e71263_Figure_2_figure_supplement_3.pdf]

**A** $\tau_u = 0.2$  s  
stimulation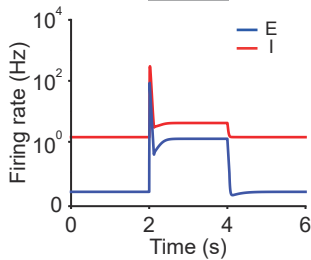 $\tau_u = 0.6$  s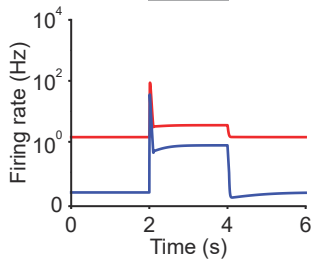 $\tau_u = 1.0$  s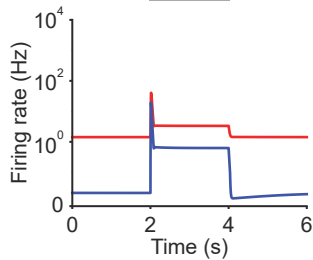**B**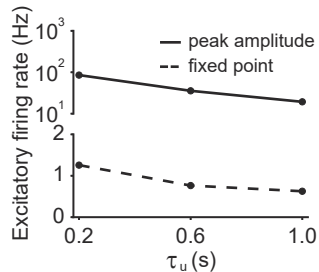**C** $U_{\max} = 4$   
stimulation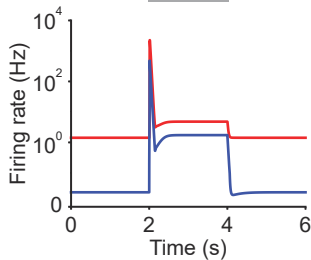 $U_{\max} = 5$ 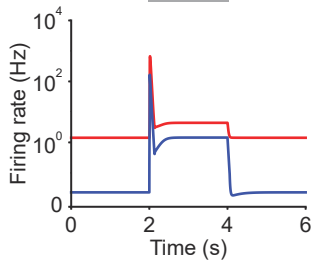 $U_{\max} = 6$ 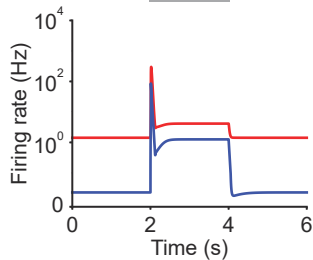**D**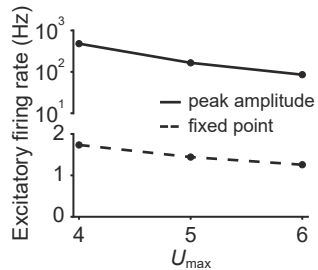

Supplement: supp [file elife_poa_e71263_Figure_2_figure_supplement_4.pdf › elife_poa_e71263_Figure_2_figure_supplement_4.pdf]

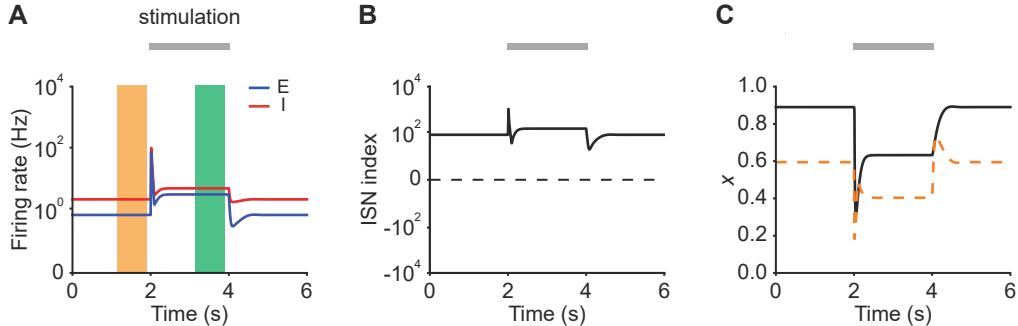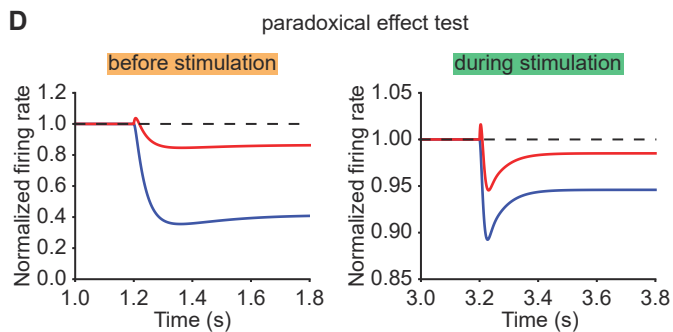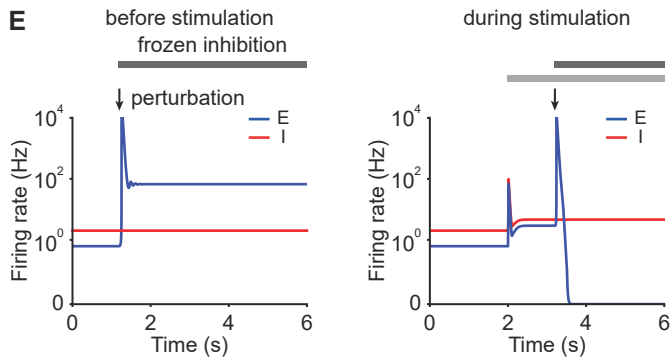

Supplement: supp [file elife_poa_e71263_Figure_2_figure_supplement_5.pdf › elife_poa_e71263_Figure_2_figure_supplement_5.pdf]

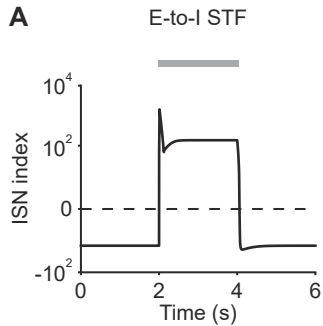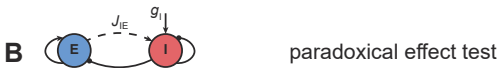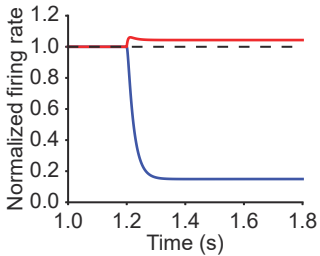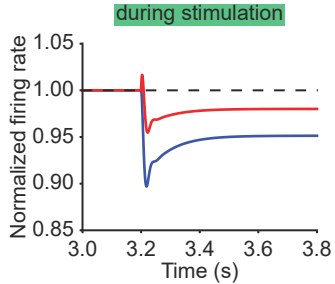

Supplement: supp [file elife_poa_e71263_Figure_2_figure_supplement_6.pdf › elife_poa_e71263_Figure_2_figure_supplement_6.pdf]

**A**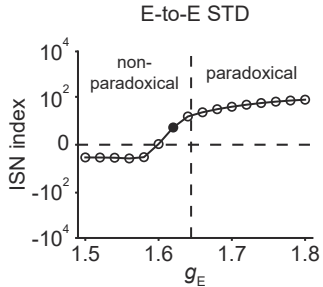**B**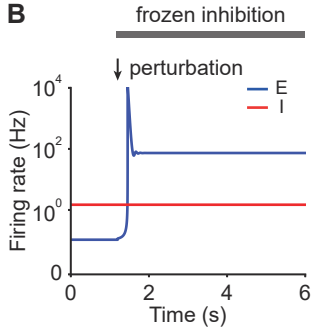**C**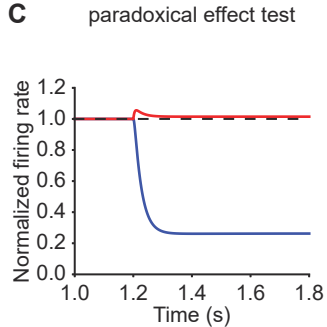

Supplement: supp [file elife_poa_e71263_Figure_2_figure_supplement_7.pdf › elife_poa_e71263_Figure_2_figure_supplement_7.pdf]

**A**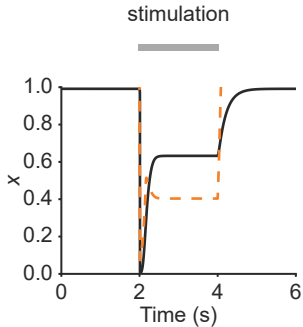**B**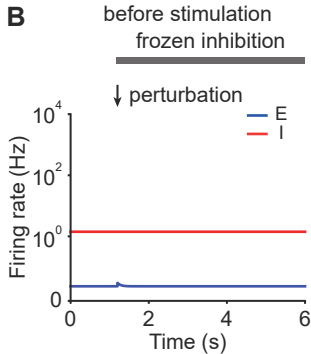

during stimulation

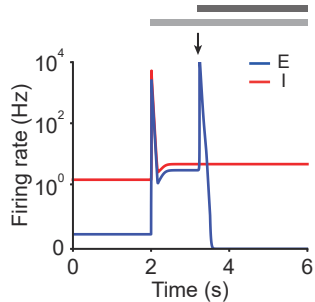

Supplement: supp [file elife_poa_e71263_Figure_2_figure_supplement_8.pdf › elife_poa_e71263_Figure_2_figure_supplement_8.pdf]

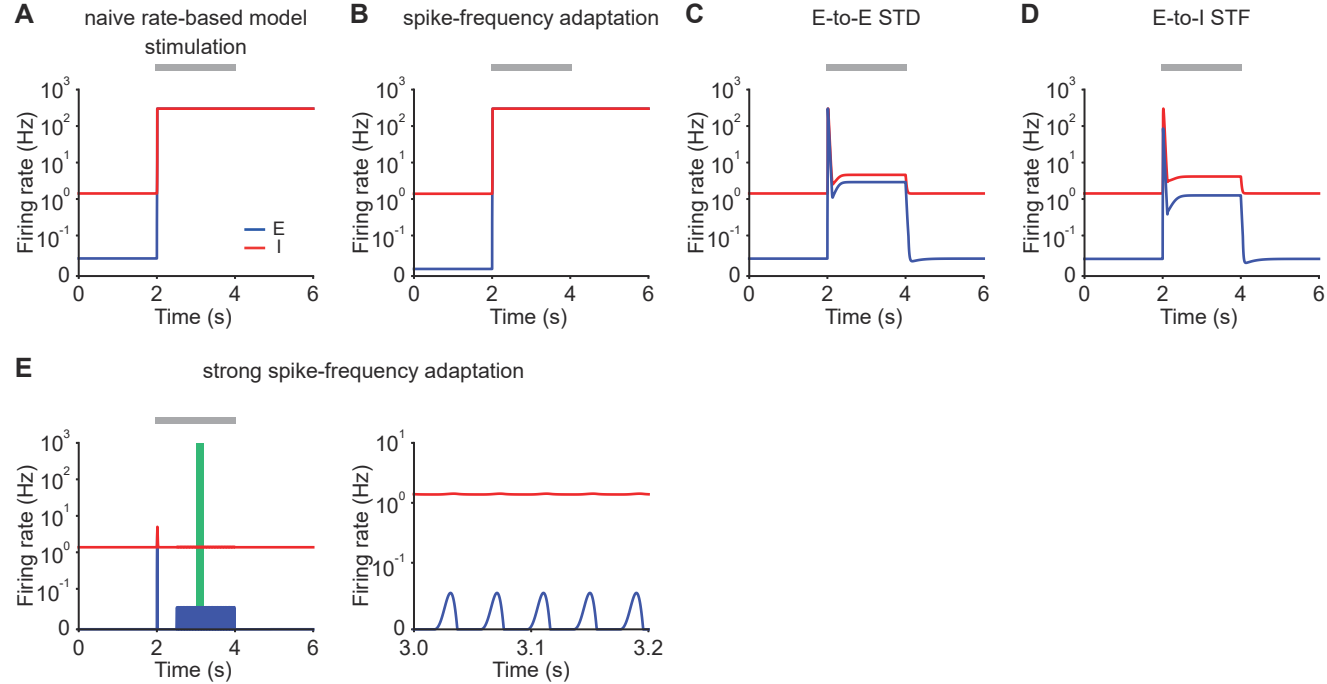

Supplement: supp [file elife_poa_e71263_Figure_2_figure_supplement_9.pdf › elife_poa_e71263_Figure_2_figure_supplement_9.pdf]

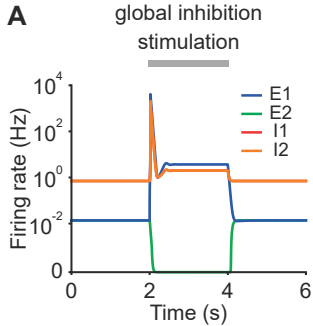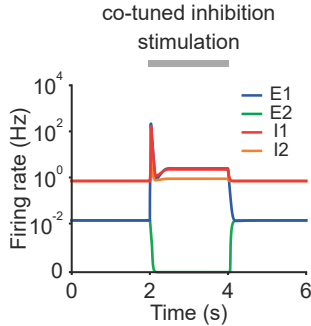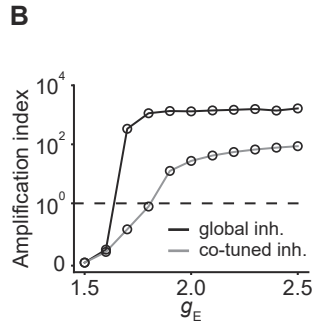

Supplement: supp [file elife_poa_e71263_Figure_3_figure_supplement_1.pdf › elife_poa_e71263_Figure_3_figure_supplement_1.pdf]

**A**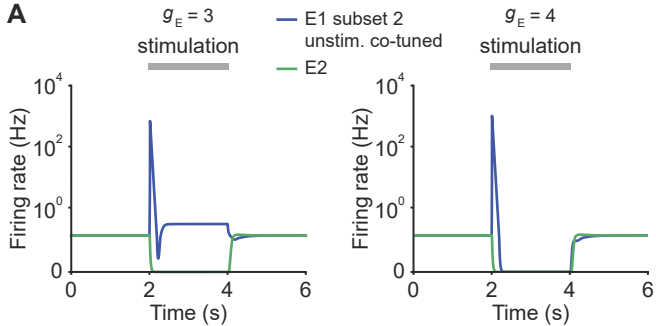**B**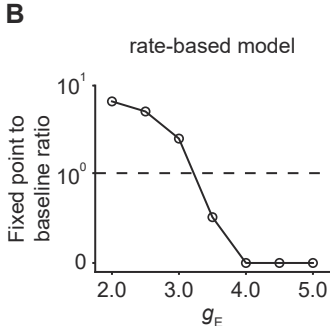

Supplement: supp [file elife_poa_e71263_Figure_4_figure_supplement_1.pdf › elife_poa_e71263_Figure_4_figure_supplement_1.pdf]

**A**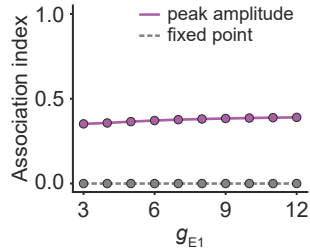**B**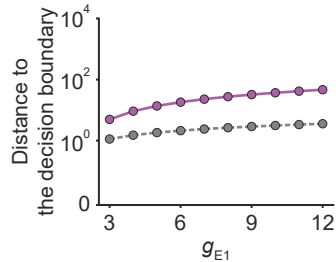**C**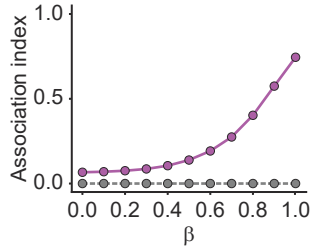**D**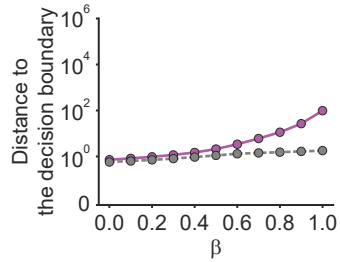

Supplement: supp [file elife_poa_e71263_Figure_4_figure_supplement_2.pdf › elife_poa_e71263_Figure_4_figure_supplement_2.pdf]

**A**

E-to-E STD

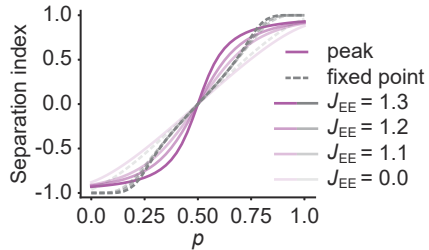**B**

E-to-E STD

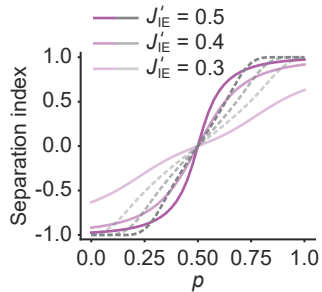

Supplement: supp [file elife_poa_e71263_Figure_5_figure_supplement_1.pdf › elife_poa_e71263_Figure_5_figure_supplement_1.pdf]

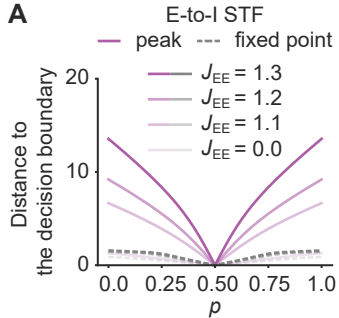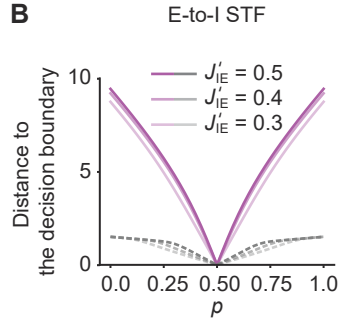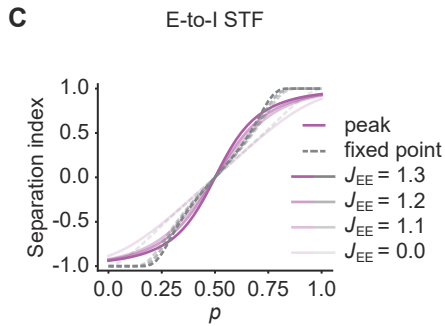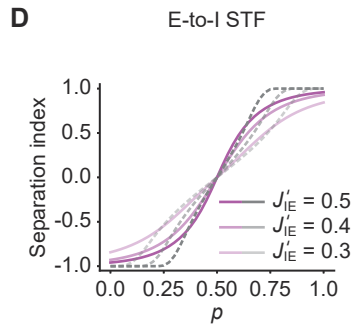

Supplement: supp [file elife_poa_e71263_Figure_5_figure_supplement_2.pdf › elife_poa_e71263_Figure_5_figure_supplement_2.pdf]

spiking neural network

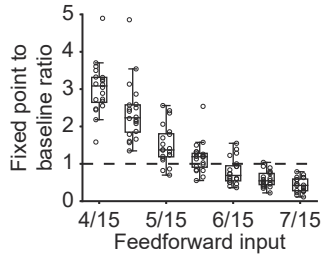

Supplement: supp [file elife_poa_e71263_Figure_6_figure_supplement_1.pdf › elife_poa_e71263_Figure_6_figure_supplement_1.pdf]
